# Supplementary material
Source: MDPI journal article supplement (https://www.mdpi.com/2504-446X/7/7/411)

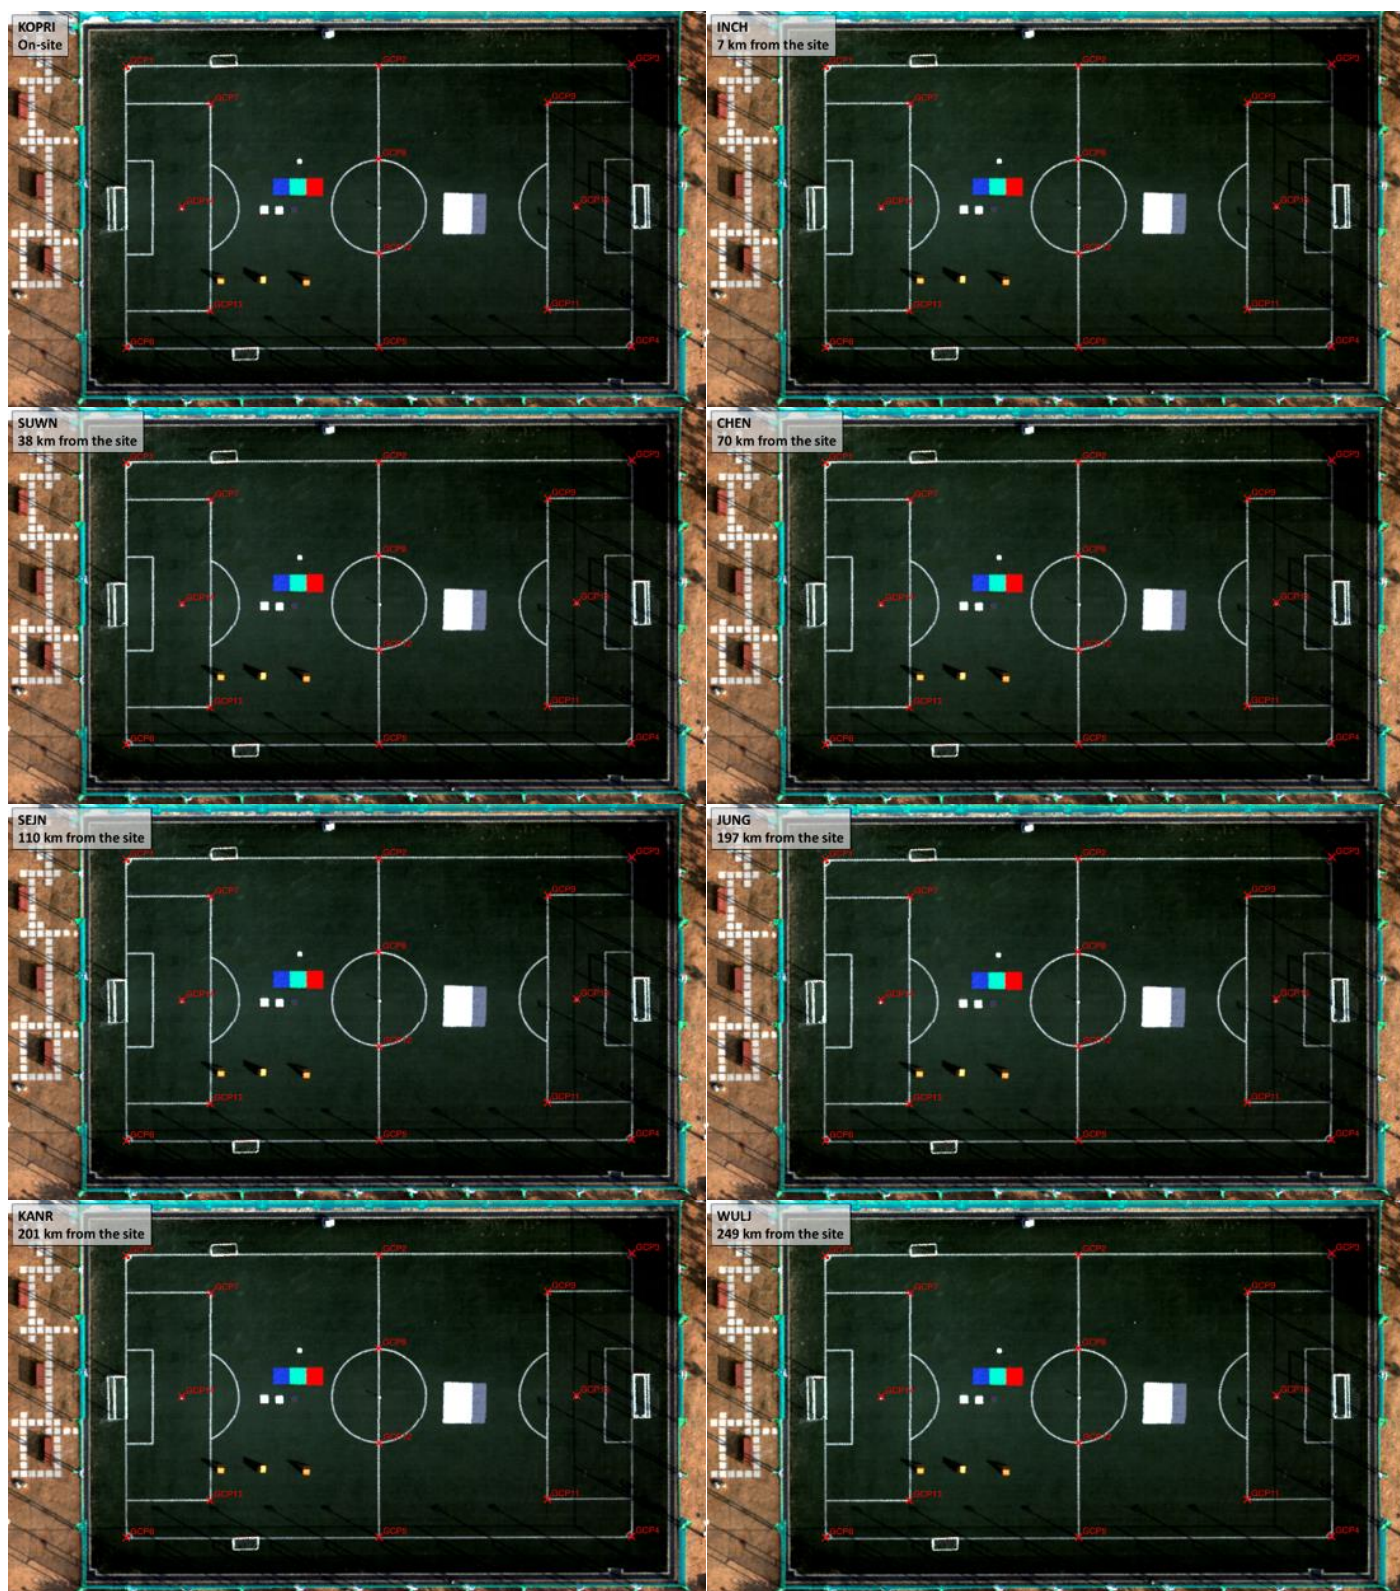

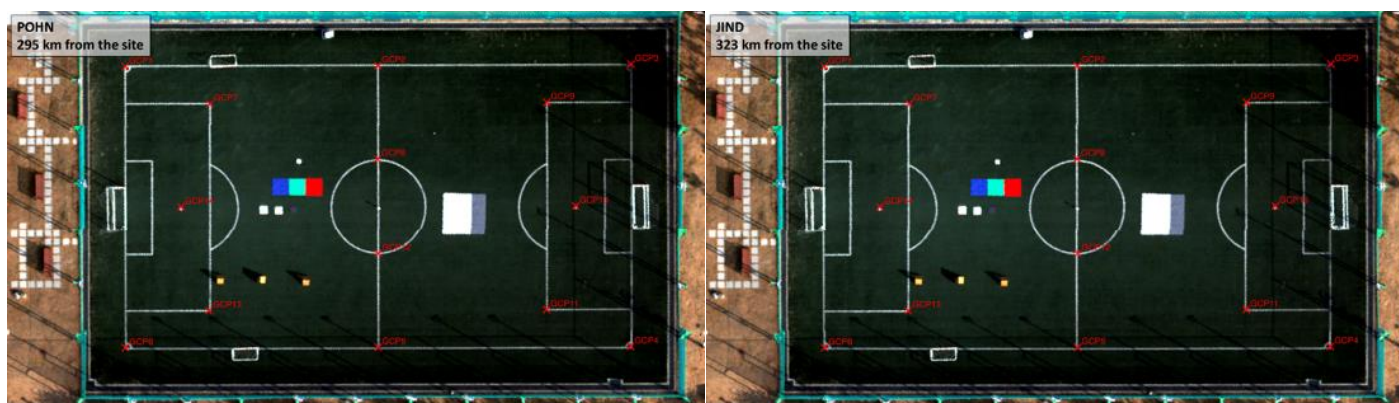

**Figure S1.** Image locations of the surveyed GCPs relative to the distance of CORS.

Supplement: s1 [file s1 › drones-2025635-supplementary.pdf]
